# Supplementary material for: Seasonal variability of lung function and Asthma Quality of Life Questionnaire Scores in adults with uncontrolled asthma
Source: PubMed Central journal article supplement — BMJ Open Respir Res. 2019 Nov 11;6(1):e000406. doi: 10.1136/bmjresp-2019-000406 (PMC6890391; doi:10.1136/bmjresp-2019-000406), 2019-11-11
Supplement: bmjresp-2019-000406supp001.pdf [file bmjresp-2019-000406supp001.pdf]

1 **TITLE:**

2 **Seasonal Variability of Lung Function and Asthma Quality of Life**  
3 **Questionnaire Scores in Adults with Uncontrolled Asthma**

4

5 Rebecca N. Bauer, PhD\*<sup>1</sup>, Xiaoying Yang, PhD<sup>1</sup>, Tracy L. Staton, PhD<sup>1</sup>, Julie  
6 Olsson, MD, MS<sup>1</sup>, Cecile T.J. Holweg, PhD<sup>1</sup>, Joseph R. Arron, MD, PhD<sup>1</sup>, John G.  
7 Matthews, MB, BS, PhD<sup>2</sup>, David F. Choy, BS\*

8 <sup>1</sup>Genentech, Inc. South San Francisco, CA, USA

9 <sup>2</sup>Currently 23andMe, Sunnyvale, CA, USA

10 \*DFC and RNB are co-senior authors

11 DFC: 1 DNA Way, South San Francisco, CA 94080, (phone) 650-467-4945,

12 [choy.david@gene.com](mailto:choy.david@gene.com)

13 RB: 1 DNA Way, South San Francisco, CA 94080, (phone) 650-225-3470,

14 [bauer.rebecca@gene.com](mailto:bauer.rebecca@gene.com)

15

16

17 **SUPPLEMENTARY FIGURE LEGENDS**

18 **Figure 1. Seasonal analysis of lung function and AQLQ outcomes by**  
19 **baseline blood eosinophil classification.** Hemisphere normalized (see  
20 Methods) per-month least-squares means ( $\text{lsmeans} \pm \text{s.e.}$ ) are plotted for **A** Peak  
21 Expiratory Flow (PEF), **B** pre-bronchodilator FEV<sub>1</sub>, **C** FVC, **D** rescue medication  
22 use (puffs), and **E** Standardized Asthma Quality of Life Questionnaire (AQLQ{S})  
23 scores for subjects with blood eosinophils  $< 300/\mu\text{L}$  (left) or  $\geq 300/\mu\text{L}$  (right) at  
24 baseline.

25 **Figure 2. Seasonal analysis of individual questions of the AQLQ(S).** Seasonal  
26 variability was estimated by the contrast of December versus July for all subjects  
27 in the study. A) Coughing and B) Avoid Strong Smells or Perfume questions were  
28 most and least seasonably variable respectively.

29

30

## 31 TABLES AND LEGENDS

|                                        | Difference | Lower 95%<br>CI | Upper 95%<br>CI |
|----------------------------------------|------------|-----------------|-----------------|
| Coughing                               | -0.33      | -0.42           | -0.24           |
| Wheeze                                 | -0.25      | -0.33           | -0.16           |
| Clear Throat                           | -0.25      | -0.33           | -0.16           |
| Morning Symptoms                       | -0.21      | -0.3            | -0.12           |
| Nocturnal Awakenings                   | -0.21      | -0.29           | -0.12           |
| Chest Tightness                        | -0.19      | -0.27           | -0.1            |
| Night Sleep Interference               | -0.18      | -0.27           | -0.1            |
| Symptoms from Cigarette Smoke Exposure | -0.18      | -0.28           | -0.09           |
| Avoid Cigarette Smoke                  | -0.18      | -0.28           | -0.08           |
| Chest Heaviness                        | -0.18      | -0.26           | -0.1            |
| Short of Breath                        | -0.17      | -0.25           | -0.09           |
| Heavy Breathing                        | -0.16      | -0.25           | -0.08           |
| Fighting for Air                       | -0.16      | -0.24           | -0.08           |
| Concerned About Medication Use         | -0.16      | -0.25           | -0.07           |
| Symptoms from Weather or Air Pollution | -0.16      | -0.25           | -0.06           |
| Frustrated                             | -0.15      | -0.24           | -0.07           |
| Sleeping                               | -0.15      | -0.23           | -0.07           |
| Overall Range of Activities            | -0.15      | -0.23           | -0.07           |
| Afraid of Getting Out of Breath        | -0.15      | -0.24           | -0.06           |
| Moderate Activities                    | -0.15      | -0.22           | -0.07           |
| All Activities                         | -0.14      | -0.22           | -0.07           |
| Afraid of Medication Not Available     | -0.14      | -0.23           | -0.05           |
| Difficulty Breathing Out               | -0.13      | -0.21           | -0.04           |
| Concerned About Having Asthma          | -0.13      | -0.21           | -0.04           |
| Social Activities                      | -0.12      | -0.2            | -0.05           |
| Avoid Outside Weather or Air Pollution | -0.12      | -0.21           | -0.03           |
| Strenuous Activities                   | -0.12      | -0.2            | -0.04           |
| Avoid Dust                             | -0.11      | -0.2            | -0.02           |
| Symptoms from Dust Exposure            | -0.11      | -0.2            | -0.02           |
| Work-Related Activities                | -0.1       | -0.18           | -0.02           |
| Avoid Strong Smells or Perfume         | -0.09      | -0.18           | 0               |
| Symptoms from Strong Smells or Perfume | -0.08      | -0.16           | 0.01            |

32

33 **Table 1. Seasonal analysis of individual questions of the AQLQ(S).** Seasonal  
34 variability was estimated by the contrast of December and July for all subjects in  
35 the study. Estimates for all the questions are tabulated with the larger, ordered by  
36 the effect size. The difference in means, lower and upper 95% (Bonferonni  
37 adjusted) confidence intervals are tabulated.

38

39

40 **SUPPLEMENTARY REFERENCES**

41

42
