# Supplementary figures and images for: Seasonal variability of lung function and Asthma Quality of Life Questionnaire Scores in adults with uncontrolled asthma
Source: PubMed Central journal article supplement — BMJ Open Respir Res. 2019 Nov 11;6(1):e000406. doi: 10.1136/bmjresp-2019-000406 (PMC6890391; doi:10.1136/bmjresp-2019-000406), 2019-11-11

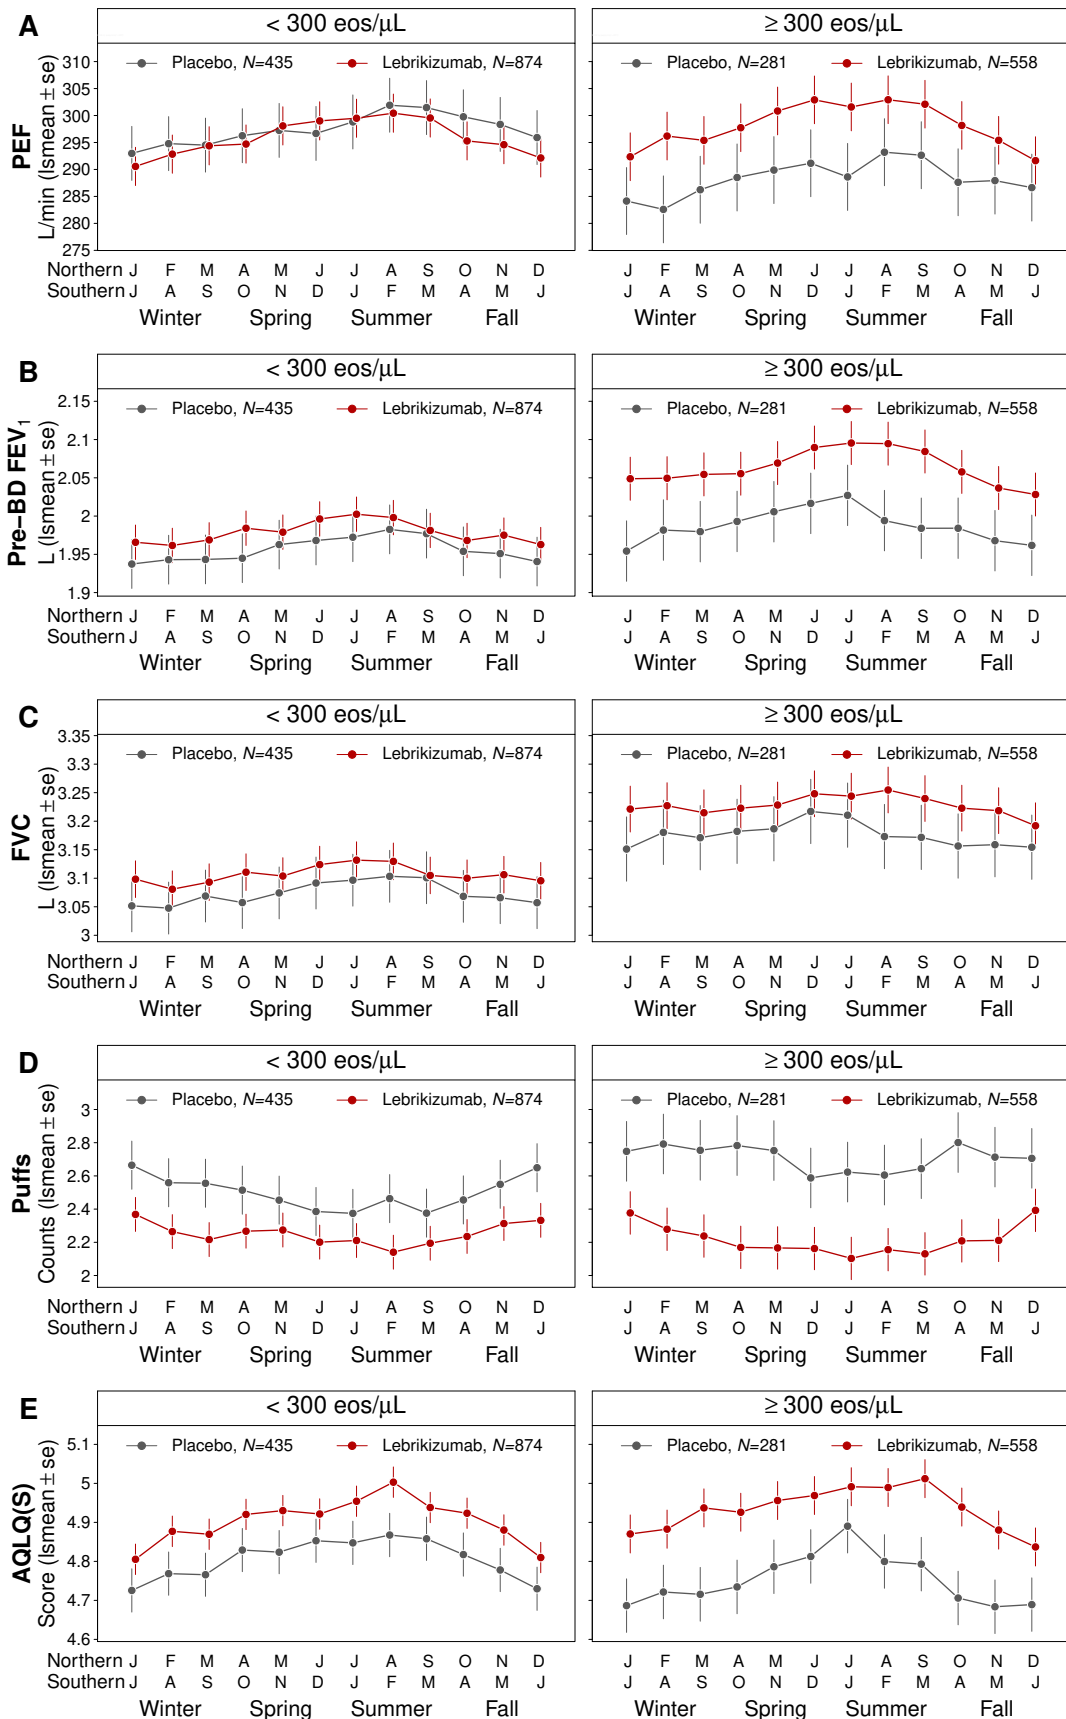

Supplement: bmjresp-2019-000406supp002.pdf [file bmjresp-2019-000406supp002.pdf]

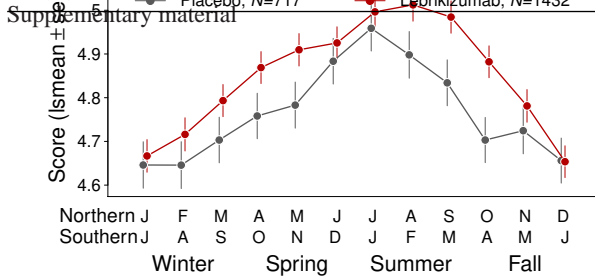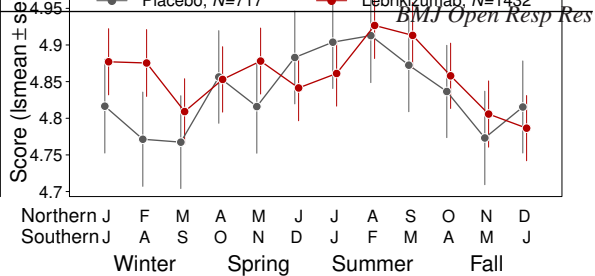

Supplement: bmjresp-2019-000406supp003.pdf [file bmjresp-2019-000406supp003.pdf]
